# Supplementary material for: MiR-122 Targets SerpinB3 and Is Involved in Sorafenib Resistance in Hepatocellular Carcinoma
Source: PubMed Central journal article supplement (PMC6406326; doi:10.3390/jcm8020171), 2019-02-01
Supplement: jcm-08-00171-s001.pdf [file jcm-08-00171-s001.pdf]

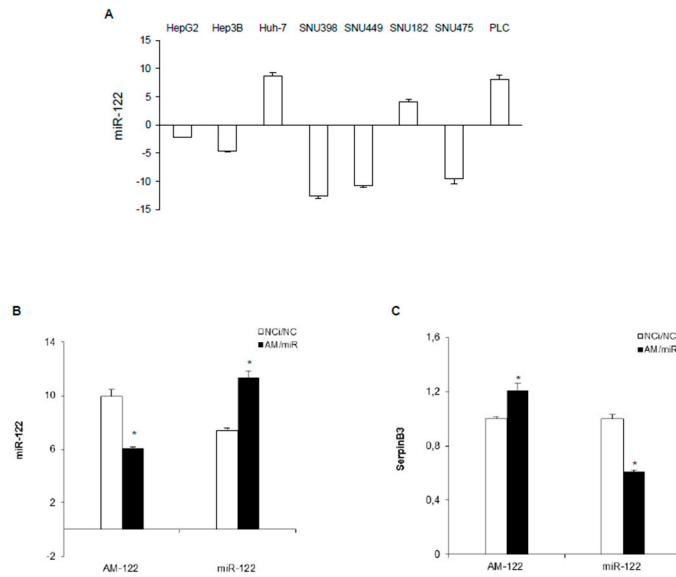

**Figure S1.** MiR-122 expression in HCC cell lines; (A) qPCR analysis of miR-122 levels in eight HCC cell lines. U6RNA was used as housekeeping gene. Y-axis reports  $2^{-\Delta\Delta C_t}$  levels expressed in logarithmic form. (B) qPCR analysis of miR-122 and (C) SerpinB3 levels following miR-122 inhibitor (AM-122) or miR-122 mimic transfection in Huh-7 cells stably overexpressing SerpinB3 (Huh-7 SB3), with respect to controls. U6RNA and  $\beta$ -Actin were used as housekeeping genes. Y-axis reports  $2^{-\Delta\Delta C_t}$  miR-122 levels expressed in logarithmic form and relative SerpinB3 expression levels. NCi: miRNA inhibitors negative control; NC: miRNA precursor negative control. (\*  $p < 0.05$ ).

**Table 1.** Primer sequences and PCR conditions.

| Gene name                       | Species           | Primer Sequences                                                       | PCR product (bp) | Anneling T (°C) | Cycles |
|---------------------------------|-------------------|------------------------------------------------------------------------|------------------|-----------------|--------|
| <i>SerpinB3</i>                 | Homo sapiens      | Fw 5'-AACTCCTGGGTGGAAAAGTCAA-3'<br>Rv 5'-ACCAATGTGGTATTGCTGCCAA-3'     | 83               | 60              | 45     |
| <i>EpCam</i>                    | Homo sapiens      | Fw 5'-CAATGCAGGGTCTAAAAGCTG-3'<br>Rv 5'-CACCCATCTCCTTTATCTCAGC-3'      | 140              | 61.8            | 45     |
| <i>CD133</i>                    | Homo sapiens      | Fw 5'-GTGGATGCAGAACTTGACAA-3'<br>Rv 5'-ACCCTTTGATACCTGCTACG-3'         | 117              | 61.8            | 45     |
| <i>SerpinB3</i>                 | Rattus Norvegicus | Fw 5'-GAGGTACAGATCGCCAGAAAG-3'<br>Rv 5'-TCCCTGTTTTCTCGTCTGTTC-3'       | 149              | 61.8            | 45     |
| <i>GAPDH</i>                    | Homo sapiens      | Fw 5'-TGGTATCGTGAAGGACTCATGAC-3'<br>Rv 5'-ATGCCAGTGAGCTTCCCCTCAGC-3'   | 189              | 60              | 45     |
| <i><math>\beta</math>-ACTIN</i> | Rattus Norvegicus | Fw 5'-CACTTTCTACAATGAGCTGCG-3'<br>Rv 5'-CTGGATGGCTACGTACATGG-3'        | 147              | 60              | 45     |
| <i>SerpinB3 3'UTR</i>           | Homo sapiens      | Fw 5'-AATCTAGAAGAGAACTCACTGC-3'<br>Rv 5'-ATCTAGAGAAAAGAGAAAAGGCATGC-3' | 587              | 59.5            | 40     |
